# Supplementary material for: Water molecular structure underpins extreme desiccation tolerance of the resurrection plant Haberlea rhodopensis
Source: PubMed Central journal article supplement (PMC6395626; doi:10.1038/s41598-019-39443-4), 2019-02-28
Supplement: 41598_2019_39443_MOESM1_ESM.pdf [file 41598_2019_39443_MOESM1_ESM.pdf]

1 **Water molecular structure underpins extreme desiccation tolerance of**  
2 **the resurrection plant *Haberlea rhodopensis***

3 Shinichiro Kuroki<sup>a,†</sup>, Roumiana Tsenkova<sup>b,†, \*</sup>, Daniela Moyankova<sup>c</sup>, Jelena Muncan<sup>d</sup>,  
4 Hiroyuki Morita<sup>e</sup>, Stefka Atanassova<sup>f</sup>, Dimitar Djilianov<sup>c, \*</sup>

5 <sup>a</sup>Laboratory for Information Engineering of Bioproduction, Graduate School of  
6 Agricultural Science, Kobe University, 1-1 Rokkodai, Nada, Kobe 657-8501, Japan

7 <sup>b</sup>Biomeasurement Technology Laboratory, Graduate School of Agricultural Science,  
8 Kobe University, 1-1 Rokkodai, Nada, Kobe 657-8501, Japan

9 <sup>c</sup>Abiotic stress, AgroBioInstitute, Agricultural Academy, 8 Dragan Tzankov Blvd., 1164  
10 Sofia, Bulgaria

11 <sup>d</sup>Nanolab, Biomedical Engineering, Faculty of Mechanical Engineering, University of  
12 Belgrade, Kraljice Marije 16, Belgrade 11120, Serbia

13 <sup>e</sup>NIRECO CORPORATION, 2951-4, Ishikawa machi, Hachioji, Tokyo, Japan, Japan

14 <sup>f</sup>Department of Biochemistry, Microbiology and Physics, Faculty of Agriculture, Trakia  
15 University, Stara Zagora, Bulgaria

16 <sup>†</sup> Both authors should be considered as first authors

17 **\* Corresponding authors:**

18 Roumiana Tsenkova +81 90-5652-3639, [rtsen@kobe-u.ac.jp](mailto:rtsen@kobe-u.ac.jp)

19 Dimitar Djilianov, +359 2 9635413, [d\\_djilianov@abi.bg](mailto:d_djilianov@abi.bg)

20 **Table S1. Dehydration and subsequent rehydration of *Deinostigma eberhardtii* and**  
 21 ***Haberlea rhodopensis*.** Sample timing and measured RWC content. Empty fields indicate  
 22 times when measurements were not performed.

|                                       | <b>Dehydration duration [h]</b>    | <b>RWC [%]</b>                  | <b>Rehydration duration [h]</b> | <b>RWC [%]</b>                  |
|---------------------------------------|------------------------------------|---------------------------------|---------------------------------|---------------------------------|
| <b><i>Deinostigma eberhardtii</i></b> | 0                                  | 91.09                           | 1                               | --                              |
|                                       | 1                                  | 71.13                           | 2                               | --                              |
|                                       | 2                                  | --                              | 3                               | --                              |
|                                       | 3                                  | 45                              | 6                               | --                              |
|                                       | 6                                  | 45.18                           | 24                              | --                              |
|                                       | 24                                 | 43.75                           | 48                              | 83.35                           |
|                                       | 48                                 | 34.78                           | --                              | --                              |
|                                       | 72                                 | 22.58                           | --                              | --                              |
|                                       | 120                                | 12.64                           | --                              | --                              |
|                                       | 168                                | 9.11                            | --                              | --                              |
|                                       | <b><i>Haberlea rhodopensis</i></b> | <b>Dehydration duration [h]</b> | <b>RWC[%]</b>                   | <b>Rehydration duration [h]</b> |
| 0                                     |                                    | 93.37                           | 1                               | 56.48                           |
| 1                                     |                                    | 72.6                            | 2                               | 56.12                           |
| 2                                     |                                    | 57.19                           | 3                               | 55.63                           |
| 3                                     |                                    | 36.19                           | 6                               | 67.13                           |
| 6                                     |                                    | 24.85                           | 24                              | 90.65                           |
| 24                                    |                                    | 13                              | 48                              | 90.75                           |
| 48                                    |                                    | 12.85                           | --                              | --                              |
| 72                                    |                                    | 12.85                           | --                              | --                              |
| 120                                   |                                    | 12.85                           | --                              | --                              |
| 168                                   |                                    | 12.85                           | --                              | --                              |

23

24 **Table S2. Assignments of the NIR vibrational absorption spectrum of water.  $\nu_r$ ,  $\nu_1$ ,**  
 25  **$\nu_2$  and  $\nu_3$  indicate rotational, symmetric stretching, bending and antisymmetric**  
 26 **stretching mode of the water molecule, respectively.  $a$ ,  $b$  are integers,  $\geq 0$ .**

27

|             | $\nu_r$   | $\nu_1$  | $\nu_2$   | $\nu_3$    | Peak position | References |
|-------------|-----------|----------|-----------|------------|---------------|------------|
| $a + b = 2$ |           | $a\nu_1$ | $+ \nu_2$ | $+ b\nu_3$ | 1200 nm       |            |
| $a + b = 2$ |           | $a\nu_1$ | $+$       | $b\nu_3$   | 1450 nm       | 1-7        |
| $a + b = 1$ |           | $a\nu_1$ | $+ \nu_2$ | $+ b\nu_3$ | 1930 nm       |            |
| $a + b = 1$ | $\nu_r +$ | $a\nu_1$ | $+$       | $b\nu_3$   | 1346 nm       | 8          |
| $a + b = 1$ | $\nu_r +$ | $a\nu_1$ | $+ \nu_2$ | $+ b\nu_3$ | 1790 nm       |            |

28

29 **Table S3. Potential band assignments of important wavelengths in difference**  
 30 **spectra (Fig.3) and PC1 loading vector (Fig.5).**

| Wavelength | Potential assignments                                                                                                                                                                                              |
|------------|--------------------------------------------------------------------------------------------------------------------------------------------------------------------------------------------------------------------|
| 1400 nm    | Water confined in the local field of ions <sup>9</sup>                                                                                                                                                             |
| 1500 nm    | 1500nm - 1 <sup>st</sup> overtone of the NH stretching mode <sup>3,7,10</sup>                                                                                                                                      |
|            | 1500nm - 1 <sup>st</sup> overtone of the OH stretching mode <sup>3,7,10</sup>                                                                                                                                      |
|            | 1506nm – protonated water clusters [H <sup>+</sup> ·(H <sub>2</sub> O) <sub>6</sub> ] - H <sub>2</sub> O in H <sub>5</sub> O <sub>2</sub> <sup>+</sup> asymmetric stretching, 1 <sup>st</sup> overt. <sup>11</sup> |
| 1574nm     | Associated O-H str., 1 <sup>st</sup> overtone (sugar) <sup>12,13</sup>                                                                                                                                             |
| 1704nm     | C-H stretch, 1 <sup>st</sup> overtone (sugar) <sup>12,13</sup>                                                                                                                                                     |
|            | 1708nm- H-bonded OH stretching harmonic frequency of H <sub>9</sub> O <sub>4</sub> <sup>+</sup> , 1st overtone <sup>14</sup>                                                                                       |
| 1880nm     | 1876.2nm -OH stretch in fully hydrated hydronium, 1 <sup>st</sup> overtone <sup>15</sup>                                                                                                                           |
|            | 1876.2nm protonated water clusters [H <sup>+</sup> ·(H <sub>2</sub> O) <sub>4</sub> ] - H <sub>3</sub> O <sup>+</sup> asymmetric stretch, 1 <sup>st</sup> overtone <sup>11</sup>                                   |
|            | 1880nm - C-H stretch <sup>16</sup>                                                                                                                                                                                 |
|            | 1884nm free water molecules (without active H-bonds) <sup>17</sup>                                                                                                                                                 |
| 2016 nm    | Dissociated O-H stretch + O-H bend. (sugar) <sup>12,13</sup>                                                                                                                                                       |
|            | combination of amide A and amide III <sup>6,17</sup>                                                                                                                                                               |
| 2130 nm    | = C-H str. + C=C stretch (HC=CH) <sup>6,12,13</sup>                                                                                                                                                                |
|            | 2125nm C-H vibrations in isolated C=C bonds <sup>6</sup>                                                                                                                                                           |
|            | 2080-2220nm –NH deformation <sup>6</sup>                                                                                                                                                                           |
| 2226 nm    | C-H str. + C=O str. (CHO) <sup>12,13</sup>                                                                                                                                                                         |
| 2284 nm    | C-H str. + C-H bend. (CH <sub>3</sub> ) <sup>7,12,13</sup>                                                                                                                                                         |
| 2414 nm    | O-H bend. 2 <sup>nd</sup> overt. (sugar) <sup>12,13</sup>                                                                                                                                                          |

31

32 **Table S4. Assignments of the water species in the present study based on previous**  
 33 **studies.**

| Water species   | $S_r$ | $S_0$ | $S_1$ | $S_2$ | $S_3$ | $S_4$ | References    |
|-----------------|-------|-------|-------|-------|-------|-------|---------------|
| Wavelength [nm] | 1351  | 1410  | 1439  | 1456  | 1506  | 1642  | 18            |
|                 | 1346  | 1411  | 1441  | 1462  | 1490  | 1650  | 19            |
|                 | 1346  | 1412  | 1440  | 1462  | 1490  | 1650  | Present study |

34

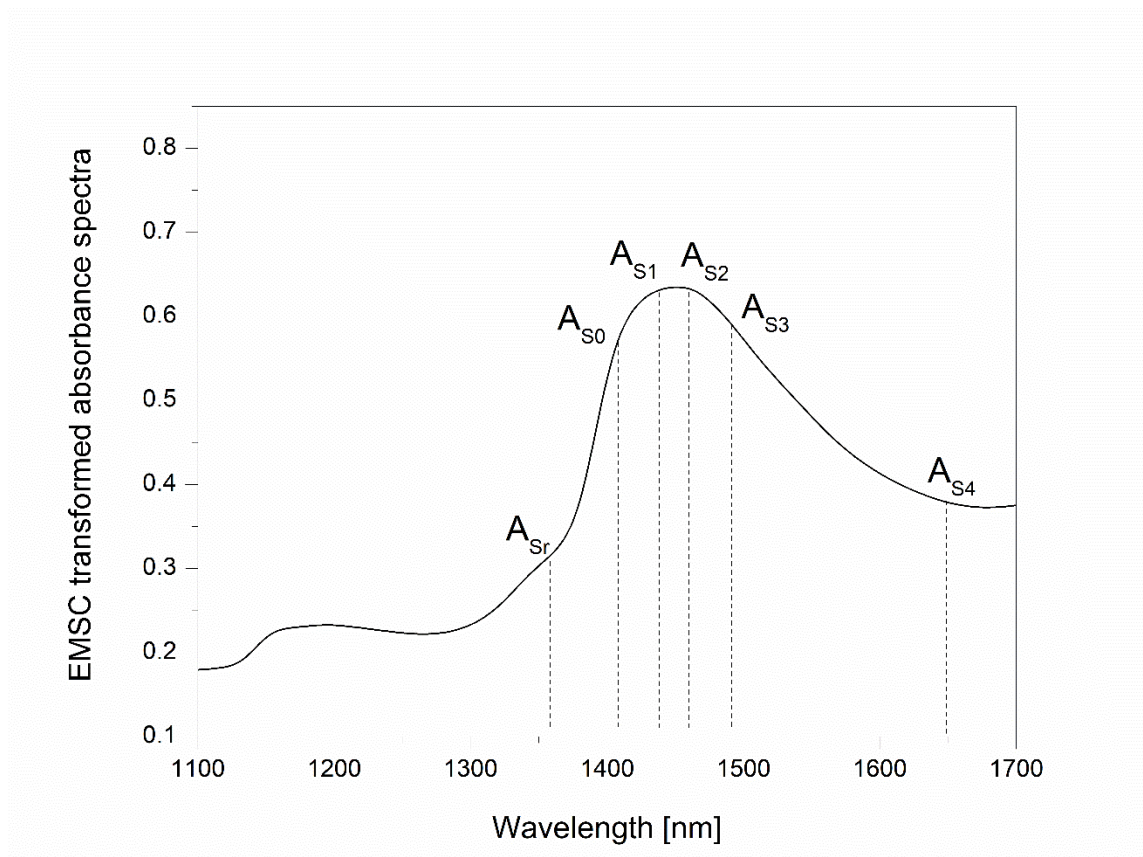

35

36 **Figure S1. Relative absorbance as a measure of how each water species contributes**  
37 **to the overall water molecular structure is calculated for each time point during**  
38 **dehydration/rehydration cycle as a ration of the mean absorbance of particular**  
39 **water species and the sum of mean absorbances of all 6 analyzed water species ( $S_r$ ,**  
40  **$S_0$ ,  $S_1$ ,  $S_2$ ,  $S_3$  and  $S_4$ ).**

## 41 Supplementary References

- 42 1. Büning-Pfaue, H. Analysis of water in food by near infrared spectroscopy. *Food*  
43 *Chem.* **82**, 107–115 (2003).
- 44 2. Luck, W. A. . Structure of Water and Aqueous Solutions. in *Proceedings of the*  
45 *International Symposium Marburg* (ed. Luck, W. A. P.) 248–284 (Verlag Chemie,  
46 1974). doi:10.1002/bbpc.19760800719
- 47 3. Workman, J. J. & Weyer, L. *Practical Guide to Interpretive Near-Infrared*  
48 *Spectroscopy. By Jerry Workman, Jr. and Lois Weyer.* (CRC Press, 2008).
- 49 4. Iwamoto, M., Uozumi, J. & Nishinari, K. Preliminary investigation of the state of  
50 water in foods by near infrared spectroscopy. in *Proceedings of International Near*  
51 *Infrared Spectroscopy / Near Infrared Technology Conference* (eds. Hello, J.,  
52 Kaffka, K. & Gonczy, J.) 3–12 (Akademiai Kiado, 1987).
- 53 5. Kawano, S. & Iyo, C. in *Useful and Advanced Information in the Field of Near*  
54 *Infrared Spectroscopy* (ed. Tsuchikawa, S.) 107–121 (Research Signpost).
- 55 6. Nielsen, S. *Food Analysis.* (Springer, 2014).
- 56 7. *Near-infrared spectroscopy: principles, instruments, applications.* (John Wiley &  
57 Sons, 2008).
- 58 8. Ellis, J. W. & Bath, J. Modifications in the Near Infra-Red Absorption Spectra of  
59 Protein and of Light and Heavy Water Molecules When Water is Bound to  
60 Gelatin. *J. Chem. Phys.* **6**, 723–729 (1938).
- 61 9. Kojić, D., Tsenkova, R., Tomobe, K., Yasuoka, K. & Yasui, M. Water Confined in  
62 the Local Field of Ions. *ChemPhysChem* **15**, 4077–4086 (2014).
- 63 10. Ozaki, Y., McClure, W. & Christy, A. *Near-infrared spectroscopy in food science*  
64 *and technology.* (John Wiley & Sons, 2006).
- 65 11. Headrick, J. M. *et al.* Spectral Signatures of Hydrated Proton Vibrations in Water  
66 Clusters. *Science* (80-. ). **308**, 1765–1769 (2005).
- 67 12. Osborne, B., Fearn, T. & Hindle, P. *Practical NIR spectroscopy with applications*  
68 *in food and beverage analysis - UCL Discovery.* (Longman Scientific and  
69 Technical, 1993).
- 70 13. Williams, P. & Norris, K. H. *Near infrared technology in the agricultural and food*  
71 *industries.* (American Association of Cereal Chemists, 1987).
- 72 14. Ojamäe, L., Shavitt, I. & Singer, S. J. Potential energy surfaces and vibrational  
73 spectra of H<sub>5</sub>O<sub>2</sub><sup>+</sup> and larger hydrated proton complexes. *Int. J. Quantum Chem.*  
74 **56**, 657–668 (1995).

- 75 15. Relph, R. A. *et al.* How the shape of an H-bonded network controls proton-  
76 coupled water activation in HONO formation. *Science* **327**, 308–12 (2010).
- 77 16. Chalmers, J. M. & Griffiths, P. R. *Handbook of vibrational spectroscopy*. (J.  
78 Wiley, 2002).
- 79 17. Alomar, D., Fuchslocher, R. & Stockebrand, S. Effects of oven- or freeze-drying  
80 on chemical composition and NIR spectra of pasture silage. *Anim. Feed Sci.*  
81 *Technol.* **80**, 309–319 (1999).
- 82 18. Maeda, H., Ozaki, Y., Tanaka, M., Hayashi, N. & Kojima, T. Near Infrared  
83 Spectroscopy and Chemometrics Studies of Temperature-Dependent Spectral  
84 Variations of Water: Relationship between Spectral Changes and Hydrogen Bonds.  
85 *J. Near Infrared Spectrosc.* **3**, 191–201 (1995).
- 86 19. Segtnan, V. . *et al.* Studies on the Structure of Water Using Two-Dimensional  
87 Near-Infrared Correlation Spectroscopy and Principal Component Analysis. *Anal.*  
88 *Chem.* **73**, 3153–3161 (2001).
- 89
